# Supplementary material for: Variation in Shrimp Allergens: Place of Origin Effects on Food Safety Assessment
Source: MDPI journal article supplement (doi:10.3390/ijms25084531), 2024-04-20
Supplement: s1 [file s1]

**Supplementary Table S1:** Commercial Crustacea allergen detection kits. Described is each commercial kit's manufacturer, product name, the main analyte detected (Tropomyosin =TM; not specified = NS), technology used (ELISA = enzyme-linked immunosorbent assay; LFD = Lateral Flow Device) and Limit of Detection (LOD).

| Manufacturer          | Product                          | Main Analyte | Technology | LOD      |
|-----------------------|----------------------------------|--------------|------------|----------|
| Biosystems ES         | Crustacean Rapid Test            | TM           | LFD        | 2.0 ppm  |
| ELISASystems          | Crustacean Residue Kit           | TM           | ELISA      | NS       |
| Eurofins Technologies | SENSISpec ELISA Crustaceans      | TM           | ELISA      | NS       |
| Eurofins Technologies | SENSIStrip Crustaceans           | TM           | LFD        | NS       |
| Hygiena               | AlerTox ELISA Crustacean         | TM           | ELISA      | 1 ppm    |
| Hygiena               | AlerTox Sticks Crustacean        | TM           | LFD        | 3 µg     |
| Morinaga              | Crustacean ELISA Kit II          | TM           | ELISA      | 0.31 ppm |
| Morinaga              | Rapid Test Easy for Crustacean   | TM           | LFD        | 0.5 ppm  |
| R-Biopharm            | RIDASCREEN®FAST Crustacean       | TM           | ELISA      | 2.0 ppm  |
| Romer Labs            | AgraQuant® Crustacea             | TM           | ELISA      | 20 ppm   |
| 3M                    | 3M™ Crustacean Protein ELISA Kit | NS           | ELISA      | 10.2 ppb |
| R-Biopharm            | Bioavid Lateral Flow Crustacean  | NS           | LFD        | 10 ppm   |
| Romer Labs            | AgraStrip Crustacea              | NS           | LFD        | 2 ppm    |
| Neogen                | Reveal 3-D for Crustacea         | NS           | LFD        | 1 ppm    |
| Neogen                | Veratox® for Crustacea           | NS           | ELISA      | <1 ppm   |

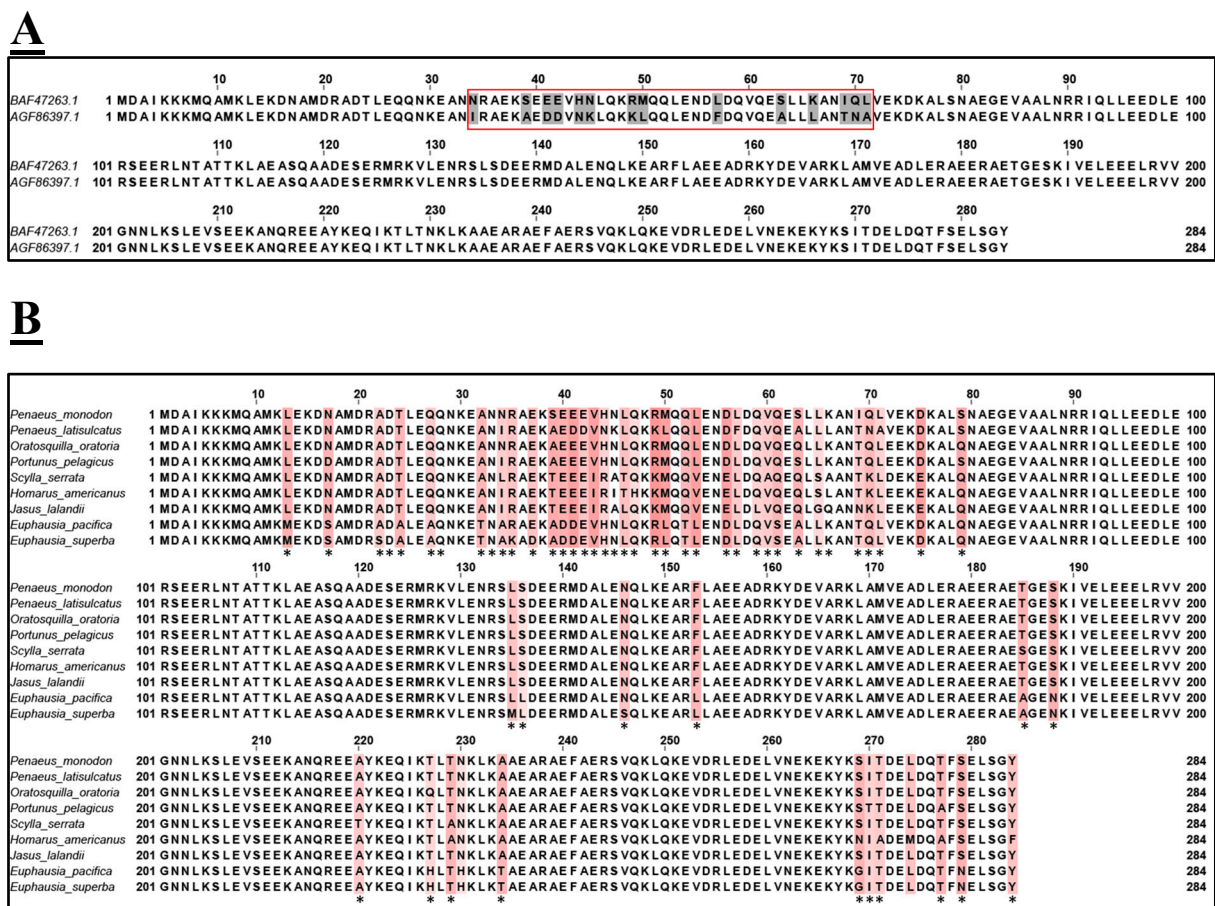

**Supplementary Figure S1 (A)** Pairwise sequence alignment of two isoforms of tropomyosin (TM) allergen identified within the transcriptome of *P. monodon*. Sequence names of isoforms are labeled with NCBI GenBank Accession number of the identified protein. Non-conserved amino acids are shaded in grey; regions of non-conserved amino acids are boxed in red. The two TM isoforms have a pairwise identity of 95%. Multiple sequence alignment was conducted in Jalview 2.11 using Clustal Omega. **(B)** Multiple sequence alignment of tropomyosin (TM) from 9 crustacean species. \* denotes non-conserved amino acids and shades of red reflect level of conservation (darker red: less conserved). Multiple sequence alignment was conducted in Jalview 2.11 using Clustal Omega.

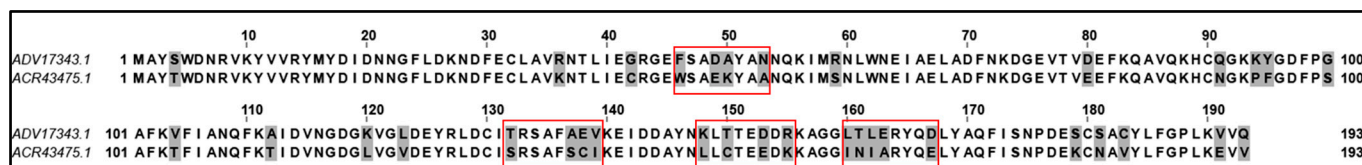

**Supplementary Figure S2:** Multiple sequence alignment of two isoforms of sarcoplasmic calcium-binding protein (SCBP) allergen identified within the transcriptome of *P. monodon*. Sequence names of isoforms are labeled with NCBI GenBank Accession number of the identified protein. Non-conserved amino acids are shaded in grey; regions of non-conserved amino acids ( $\geq 50\%$ ) are boxed in red. The two SCBP isoforms have a pairwise identity of 82%. Multiple sequence alignment was conducted in Jalview 2.11 using Clustal Omega.

**Supplementary Table S2:** WHO/IUIS registered allergenic proteins from Black Tiger Shrimp (*P. monodon*). Molecular Weight = MW (kDa). Adapted from Ruethers, Taki, Johnston, Nugraha, Le, Kalic, McLean, Kamath and Lopata [2]

| WHO/IUIS<br>menclature                      | No- | Function & Structure                                                                                                                                                                                                                                                                                                                                                                                                                             | MW<br>(kDa) | Heat<br>Stability | Ref.      |
|---------------------------------------------|-----|--------------------------------------------------------------------------------------------------------------------------------------------------------------------------------------------------------------------------------------------------------------------------------------------------------------------------------------------------------------------------------------------------------------------------------------------------|-------------|-------------------|-----------|
| <b>Tropomyosin</b>                          |     |                                                                                                                                                                                                                                                                                                                                                                                                                                                  |             |                   |           |
| Pen m 1                                     |     | Alpha-helical coiled-coil dimeric protein. Controls the contraction of muscle fibres.                                                                                                                                                                                                                                                                                                                                                            | 37          | Highly stable     | [2,47]    |
| <b>Arginine kinase</b>                      |     |                                                                                                                                                                                                                                                                                                                                                                                                                                                  |             |                   |           |
| Pen m 2                                     |     | Usually monomeric, it catalyses the reversible transfer of phosphoryl group from ATP to arginine                                                                                                                                                                                                                                                                                                                                                 | 40          | Labile            | [2,47]    |
| <b>Myosin light chain</b>                   |     |                                                                                                                                                                                                                                                                                                                                                                                                                                                  |             |                   |           |
| Pen m 3                                     |     | Part of the larger myosin macromolecular complex that makes up the functional muscle protein structure. Functions in regulation of smooth muscle contraction, and is phosphorylated by MLC kinase.                                                                                                                                                                                                                                               | 20          | Stable            | [2,47]    |
| <b>Sarcoplasmic calcium-binding protein</b> |     |                                                                                                                                                                                                                                                                                                                                                                                                                                                  |             |                   |           |
| Pen m 4                                     |     | Contains helix-loop-helix motifs which bind calcium ions, and function in the regulation of calcium-based signalling. Crustacean SCBPs have two different subunits, $\alpha$ and $\beta$ , which may form a homodimer or heterodimer that contains four EF-hand domains                                                                                                                                                                          | 20-25       | Stable            | [2,47]    |
| <b>Troponin</b>                             |     |                                                                                                                                                                                                                                                                                                                                                                                                                                                  |             |                   |           |
| Pen m 6                                     |     | A complex of three regulatory proteins involved in muscle contraction. Troponin C, the only subunit registered as an allergen in <i>P. monodon</i> regulates interaction of actin and myosin during muscle contraction on binding to calcium. Troponin I, registered as an allergen in Narrow-clawed crayfish, ( <i>Pontastacus leptodactylus</i> ) inhibits muscle contraction by binding to actin and preventing the actin-myosin interaction. | 17 -21      | Stable            | [2]       |
| <b>Hemocyanin</b>                           |     |                                                                                                                                                                                                                                                                                                                                                                                                                                                  |             |                   |           |
| Pen m 7                                     |     | Forms hexamers of 450 kDa from a combination of 75 kDa structural subunits. Each subunit has two central copper-binding domains that perform the main oxygen transport function.                                                                                                                                                                                                                                                                 | 76          | Stable            | [2,47,48] |
| <b>Triose phosphate isomerase</b>           |     |                                                                                                                                                                                                                                                                                                                                                                                                                                                  |             |                   |           |
| Pen m 8                                     |     | Involved in glycolysis and gluconeogenesis. Converts D-glyceraldehyde 3-phosphate to dihydroxyacetone phosphate                                                                                                                                                                                                                                                                                                                                  | 28          | Labile            | [2]       |
| <b>Fatty acid binding protein</b>           |     |                                                                                                                                                                                                                                                                                                                                                                                                                                                  |             |                   |           |
| Pen m 13                                    |     | Small cytosolic lipid-binding proteins responsible for transport of cytosolic long chain fatty acids and their metabolism.                                                                                                                                                                                                                                                                                                                       | 15          | Unknown           | [33]      |

| Glycogen phosphorylase |                                                                                                                                                                                            |    |         |     |
|------------------------|--------------------------------------------------------------------------------------------------------------------------------------------------------------------------------------------|----|---------|-----|
| Pen m 14               | Cytosolic protein crucial in carbohydrate metabolism and involved in development and response to hormone stimulation and environmental stress. Predominantly expressed in brain and muscle | 95 | Unknown | [6] |

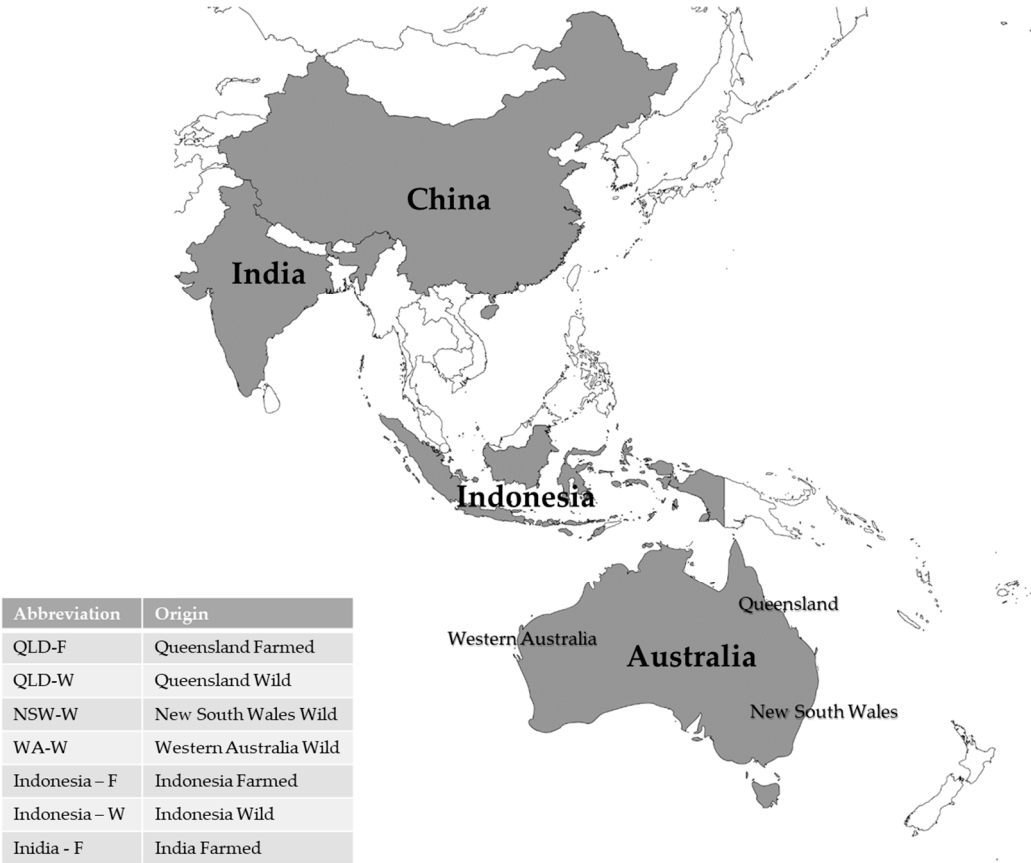

**Supplementary Figure S3:** Collection site of specimens in the Asia-Pacific. From each location seven farmed or wild *P. monodon* shrimps were collected, as described in Gopi, Mazumder, Sammut, Saintilan, Crawford and Gadd [44]
